# Supplementary material for: A new series of bis(ene-1,2-dithiolato)tungsten(iv), -(v), -(vi) complexes as reaction centre models of tungsten enzymes: Preparation, crystal structures and spectroscopic properties
Source: Royal Society of Chemistry journal article supplement (doi:10.1039/c2dt32179c), 2012-10-26
Supplement: c2dt32179c.pdf [file c2dt32179c.pdf]

## Supplementary Information

(Complete Gaussian Reference, Tables S1 and S2 and Figures S1-S4)

# **A new series of bis(ene-1,2-dithiolato)tungsten(IV), -(V), -(VI) complexes as reaction centre models of tungsten enzymes: preparation, crystal structures and spectroscopic properties.**

**Hideki Sugimoto,\*<sup>a</sup> Kohei Hatakeda,<sup>a</sup> Kazuo Toyota,<sup>b</sup> Susumu Tatemoto,<sup>a</sup> Minorun Kubo,<sup>c</sup> Takashi Ogura,<sup>c</sup> and Shinobu Itoh,\*<sup>a</sup>**

<sup>a</sup> Department of Material and Life Science, Graduate School of Engineering, Osaka University, 2-1 Yamada-oka, Suita, Osaka 565-0871, Japan. Email: sugimoto@mls.eng.osaka-u.ac.jp, shinobu@mls.eng.osaka-u.ac.jp

<sup>b</sup> Department of Chemistry, Graduate School of Science, Osaka City University, 3-3-138 Sumiyoshi-ku, Osaka 558-8585, Japan.

<sup>c</sup> Picobiology Institute, Graduate School of Life Science, University of Hyogo, 3-2-1 kouto, Ako-gun, Hyogo 678-1297, Japan.

### **Complete Gaussian Reference.**

Gaussian 09, Revision B.01, M. J. Frisch, G. W. Trucks, H. B. Schlegel, G. E. Scuseria, M. A. Robb, J. R. Cheeseman, G. Scalmani, V. Barone, B. Mennucci, G. A. Petersson, H. Nakatsuji, M. Caricato, X. Li, H. P. Hratchian, A. F. Izmaylov, J. Bloino, G. Zheng, J. L. Sonnenberg, M. Hada, M. Ehara, K. Toyota, R. Fukuda, J. Hasegawa, M. Ishida, T. Nakajima, Y. Honda, O. Kitao, H. Nakai, T. Vreven, J. A. Montgomery, Jr., J. E. Peralta, F. Ogliaro, M. Bearpark, J. J. Heyd, E. Brothers, K. N. Kudin, V. N. Staroverov, R. Kobayashi, J. Normand, K. Raghavachari, A. Rendell, J. C. Burant, S. S. Iyengar, J. Tomasi, M. Cossi, N. Rega, J. M. Millam, M. Klene, J. E. Knox, J. B. Cross, V. Bakken, C. Adamo, J. Jaramillo, R. Gomperts, R. E. Stratmann, O. Yazyev, A. J. Austin, R. Cammi, C. Pomelli, J. W. Ochterski, R. L. Martin, K. Morokuma, V. G. Zakrzewski, G. A. Voth, P. Salvador, J. J. Dannenberg, S. Dapprich, A. D. Daniels, Ö. Farkas, J. B. Foresman, J. V. Ortiz, J. Cioslowski, and D. J. Fox, Gaussian, Inc., Wallingford CT, 2009.

**Table S1.** The optimized Cartesian coordinates and converged SCF energy of  $\text{W}^{\text{VI}}\text{O}_2\text{L}^{\text{COOMe}}$ .

Charge = -2 Multiplicity = 1

---

|   |               |               |               |
|---|---------------|---------------|---------------|
| O | -0.0203909037 | 0.0266560859  | -0.0037868569 |
| O | -0.0070160407 | -0.0026809096 | 2.2552133185  |
| C | 0.6369819762  | 0.0044998434  | 1.0377514375  |
| C | -1.4268123337 | 0.0022160422  | 2.1823495948  |
| H | -1.8029215648 | 0.9015163338  | 1.6682625810  |
| H | -1.7763808826 | -0.0094949797 | 3.2247601826  |
| H | -1.8075299736 | -0.8821318036 | 1.6465171821  |
| S | 7.6286290123  | -0.0813441105 | 1.9202842550  |
| S | 5.4531352581  | -2.4723033450 | 2.5495364745  |
| S | 2.8192896069  | -0.0470913493 | 2.7866596993  |
| S | 4.5910356147  | -0.0471017660 | 0.0106388113  |
| O | 5.5684106251  | 1.9590201438  | 2.3242428575  |
| O | 5.2578261636  | 0.1528534590  | 4.3942357735  |
| O | 9.9324282550  | -3.3286274979 | 1.8613724769  |
| O | 10.2873982730 | -1.1177798238 | 1.5609306980  |
| O | 7.3561708927  | -5.0422928995 | 1.4257339929  |
| O | 7.8877372970  | -4.6137712821 | 3.5793848121  |
| O | 2.0883807652  | -1.0283674564 | -2.0540826766 |
| O | 2.0080230954  | 1.2160222982  | -1.8077742933 |
| C | 8.0717452674  | -1.8089140398 | 2.0303711718  |
| C | 7.1261533559  | -2.7818612161 | 2.2829777440  |
| C | 9.4635427428  | -2.1901931319 | 1.8220636898  |
| C | 11.6519172481 | -1.4500111324 | 1.3398756361  |
| C | 7.4832633614  | -4.2429989872 | 2.3303710236  |
| C | 2.0901298615  | -0.0134580797 | 1.1556584723  |
| C | 2.8689807167  | -0.0279564115 | 0.0164667367  |
| C | 2.2618453021  | -0.0475136256 | -1.3603785473 |
| C | 1.3962428344  | 1.2773866884  | -3.0952292821 |
| H | 12.0969374640 | -1.9413303741 | 2.2202428989  |

|   |               |               |               |
|---|---------------|---------------|---------------|
| H | 12.1607383807 | -0.4951389814 | 1.1442346150  |
| H | 11.7694320779 | -2.1242867901 | 0.4763495983  |
| H | 2.0491959907  | 0.8427268626  | -3.8684607242 |
| H | 1.2309102412  | 2.3453902660  | -3.2961787339 |
| H | 0.4380045357  | 0.7359068379  | -3.0949667088 |
| C | 8.2789718322  | -5.9809903192 | 3.6943971162  |
| H | 8.6023713287  | -6.1118997766 | 4.7368088521  |
| H | 7.4385371119  | -6.6567652692 | 3.4704324041  |
| H | 9.1079096950  | -6.2059083004 | 3.0061404946  |
| W | 5.2792341057  | 0.2631099802  | 2.6473733924  |

---

E(RB3LYP) = -2877.13354776

**Table S2.** The optimized Cartesian coordinates and converged SCF energy of  $\mathbf{W}^{\text{VI}}\mathbf{O}(\text{S})\mathbf{L}^{\text{COOMe}}$ .

Charge = -2 Multiplicity = 1

---

|   |               |               |               |
|---|---------------|---------------|---------------|
| O | 0.0490955880  | -0.0518907540 | 0.0006029244  |
| O | -0.0034874948 | -0.0108253468 | 2.2583868115  |
| C | 0.6737669616  | -0.0196166425 | 1.0612445164  |
| C | -1.4204362673 | -0.0581704711 | 2.1467682264  |
| H | -1.8120350024 | 0.8121235461  | 1.5957710172  |
| H | -1.7983845279 | -0.0519951741 | 3.1790785457  |
| H | -1.7540759081 | -0.9706091824 | 1.6271787266  |
| S | 7.5983244292  | 0.0357758926  | 2.0223133331  |
| S | 5.4563938585  | -2.3564043711 | 2.6930979024  |
| S | 2.8140202322  | 0.0500545041  | 2.8722842567  |
| S | 4.6588040361  | 0.0210754982  | 0.1768749940  |
| O | 5.5466733532  | 2.0593928916  | 2.4131170837  |
| O | 9.9221439257  | -3.1904167618 | 1.9114960901  |
| O | 10.2541202087 | -0.9783524853 | 1.5894870910  |
| O | 7.3449986000  | -4.9260471520 | 1.5487782006  |
| O | 7.9249004305  | -4.4784422504 | 3.6860552247  |
| O | 2.2756144163  | -1.0665121647 | -1.9722024508 |
| O | 2.0944788130  | 1.1757786677  | -1.7616881800 |
| C | 8.0570043547  | -1.6833284368 | 2.1213609223  |
| C | 7.1196918500  | -2.6616683151 | 2.3972512846  |
| C | 9.4451842228  | -2.0553577464 | 1.8775885093  |
| C | 11.6159140289 | -1.3015301853 | 1.3391947182  |
| C | 7.4878213553  | -4.1205893872 | 2.4454364441  |
| C | 2.1242611056  | 0.0148689276  | 1.2210262578  |
| C | 2.9354754149  | -0.0056890656 | 0.1096791555  |
| C | 2.3835443115  | -0.0700460522 | -1.2880328923 |
| C | 1.5223239461  | 1.1961791746  | -3.0690273633 |
| H | 12.0843421952 | -1.7840748114 | 2.2121720007  |
| H | 12.1126209837 | -0.3439520557 | 1.1266531019  |

|   |               |               |               |
|---|---------------|---------------|---------------|
| H | 11.7190129865 | -1.9799219897 | 0.4770670977  |
| H | 2.2149681302  | 0.7747491612  | -3.8144128145 |
| H | 1.3249064684  | 2.2543794080  | -3.2912097477 |
| H | 0.5847706877  | 0.6200503784  | -3.0901252656 |
| C | 8.3293766552  | -5.8419834732 | 3.8029802369  |
| H | 8.6728508709  | -5.9628192986 | 4.8400348844  |
| H | 7.4904596230  | -6.5257717309 | 3.5989106821  |
| H | 9.1473254992  | -6.0644052461 | 3.1008941956  |
| W | 5.2695697907  | 0.3767248489  | 2.7657695854  |
| S | 5.2273464516  | 0.3034064640  | 4.9886740801  |

---

E(RB3LYP) = -3200.11265482

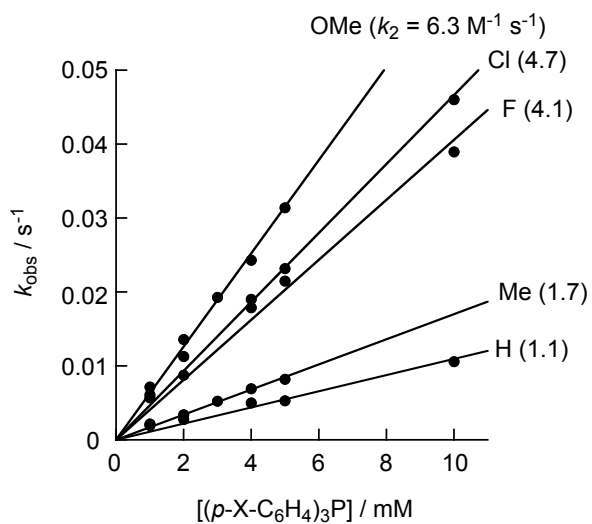

**Fig. S1** Plots of  $k_{\text{obs}}$  vs.  $[(p\text{-X-C}_6\text{H}_4)_3\text{P}]$  in the sulfur atom transfer from  $\text{W}^{\text{VI}}\text{O}(\text{S})\text{L}^{\text{COOMe}}$  to  $(p\text{-X-C}_6\text{H}_4)_3\text{P}$

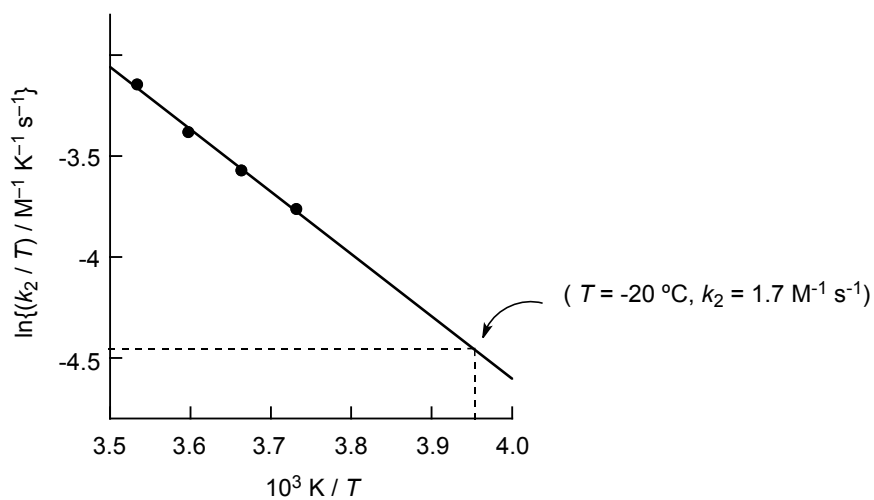

**Fig. S2** The Eyring plot for the sulfur atom transfer from  $\text{W}^{\text{VI}}\text{O}(\text{S})\text{L}^{\text{COOMe}}$  to  $\text{P}(p\text{-Cl-C}_6\text{H}_4)_3$ .

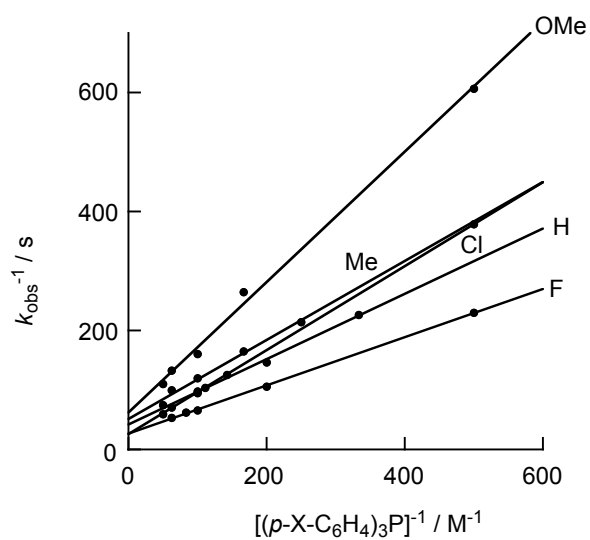

**Fig. S3** The double reciprocal plots of  $k_{\text{obs}}^{-1}$  against  $[(p\text{-X-C}_6\text{H}_4)_3\text{P}]^{-1}$ .

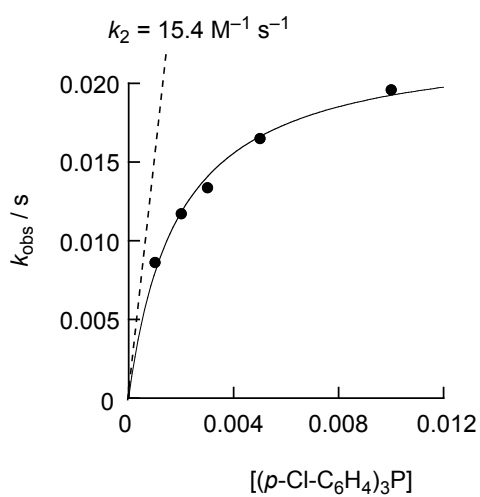

**Fig. S4** Plot of  $k_{\text{obs}}$  vs.  $[(p\text{-Cl-C}_6\text{H}_4)_3\text{P}]$ . The  $k_2$  ( $\text{M}^{-1} \text{ s}^{-1}$ ) was obtained as an initial slope (dotted line) of the curvature.
